# Supplementary figures and images for: No detectable Weddell Sea Antarctic Bottom Water export during the Last and Penultimate Glacial Maximum
Source: Springer Nature journal article supplement (doi:10.1038/s41467-020-14302-3), 2020-01-22

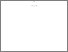

Supplement: MOESM1 [file 41467_2020_14302_MOESM1_ESM.pdf]
